# Supplementary material for: Development of a Noninvasive Diagnostic Model Using Machine Learning for the Identification of Precocious Puberty in Girls
Source: Research Square preprint supplement (doi:10.21203/rs.3.rs-6185748/v1), 2025-03-14
Supplement: Supplementary file 1 [file d86a09a181a44424e782b462.docx]

**Table S1.** Characteristics of the participants according to the diagnosis.

| Characteristic | CPP  (n = 32) | EFP  (n = 14) | IPT  (n = 14) | PA  (n = 16) |
| --- | --- | --- | --- | --- |
| Age at first consultation (years) | 7.2 ± 1.4 | 9.3 ± 0.8 | 5.7 ± 2.8 | 7.1 ± 1.6 |
| Age of thelarche (years) | 6.9 ± 1.4 | 8.8 ± 0.5 | 5.1 ± 2.7 | - |
| Age of pubarche (years) | 7.3 ± 1.6 | 8.0 ± 1.4 | - | 6.0 ± 1.3 |
| Prematurity - nº (%) | 2 (6.3) | 2 (14.3) | 1 (7) | 2 (12.5) |
| SGA - nº (%) | 4 (12.5) | 5 (35.7) | 1 (7) | 1 (6.3) |
| Weight-for-age z-score | 0.8 (0,3; 1.5) | 0 (-0.4; 0.8) | 0 (-0.5; 0.5) | 1.3 (0.2; 2.1) |
| Height-for-age z-score | 0.7 (0; 1.6) | -0.5 (-1.1; 0.6) | -0.2 (-0.6; 0.6) | 1.0 (-0.2; 1.5) |
| BMI z-score | 0.9 (0.4; 1.4) | 0.6 (0.2; 1.0) | 0 (-0.6; 0.8) | 1.4 (0.3; 1.8) |
| Overweight - nº (%) | 14 (43.8) | 5 (35.7) | 2 (14.3) | 6 (37.5) |
| Obesity - nº (%) | 1 (3.1) | 0 | 0 | 3 (18.8) |
| Tanner breast score - nº (%) |  |  |  |  |
| 1 | 0 | 0 | 0 | 16 (100) |
| 2 | 20 (62.5) | 6 (42.9) | 11 (78.6) | 0 |
| 3 | 10 (31.2) | 5 (35.7) | 3 (21.4) | 0 |
| 4 | 2 (6.3) | 3 (21.4) | 0 | 0 |
| Tanner pubic hair score - nº (%) |  |  |  |  |
| 1 | 14 (43.8) | 2 (14.3) | 14 (100) | 0 |
| 2 | 12 (37.5) | 4 (28.6) | 0 | 12 (75) |
| 3 | 4 (12.5) | 6 (42.8) | 0 | 3 (18.8) |
| 4 | 2 (6.2) | 2 (14.3) | 0 | 1 (6.3) |
| Target height (cm) | 163 ± 5 | 161 ± 4 | 163 ± 5 | 164 ± 3 |
| LH (IU/L) | 0.35 (0.1; 1.3) | 1.0 (0.47; 5.2) | 0.1 (0.1; 0,1) | 0.1 (0.1; 0.1) |
| FSH (IU/L) | 3.0 (2.2; 5.2) | 3.7 (2.5; 6.0) | 1.73 (1.7; 2.8) | 1.44 (1.4; 2.3) |
| LH peak on GnRHa test (IU/L) | 7.3 (4.5; 16.6) | - | 2.9 (2.2; 3.0) | - |
| BA - CA (months) | 16 (11.5; 23.7) | 17 (8.7; 25.5) | 3.0 (2.0; 7.2) | 18 (7.5; 22.7) |

Data are presented as mean ± SD, median (IQR), or number of cases (%) unless otherwise indicated.

BMI: body mass index; CPP: central precocious puberty; EFP: early and fast puberty; FSH: follicle-stimulating hormone; GnRHa: gonadotropin-releasing hormone agonist; IPT: isolated premature thelarche; LH: luteinizing hormone; PA: premature adrenarche; SGA: small for gestational age.

BA – CA: the difference between bone age and chronological age at the time of measurement.
